# Supplementary material
Source: publisher site journal article supplement (https://www.dovepress.com/article/394535)
Supplement: Supplementary file 1 [file get_supplementary_file.php]

**Supplementary section**

**Mechanism of action:**

Figure S1 shows the explanatory pathway of isoniazid activation as well as the role of the InhA protein in mycolic acid synthesis, it also shows the scope of our problem, and the need for direct inhibition of this protein.

**
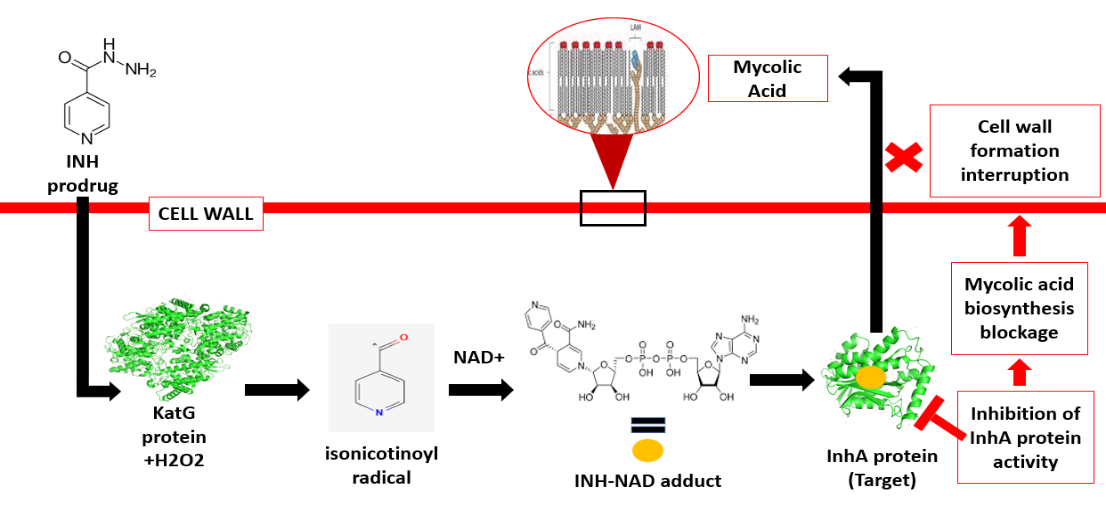
**

Figure S : The pathway of isoniazid activation and the role of InhA protein in mycolic acid synthesis.

**3D pharmacophore modelling**

After the generation of the pharmacophore map, the distances between the detected features are shown in figure S2


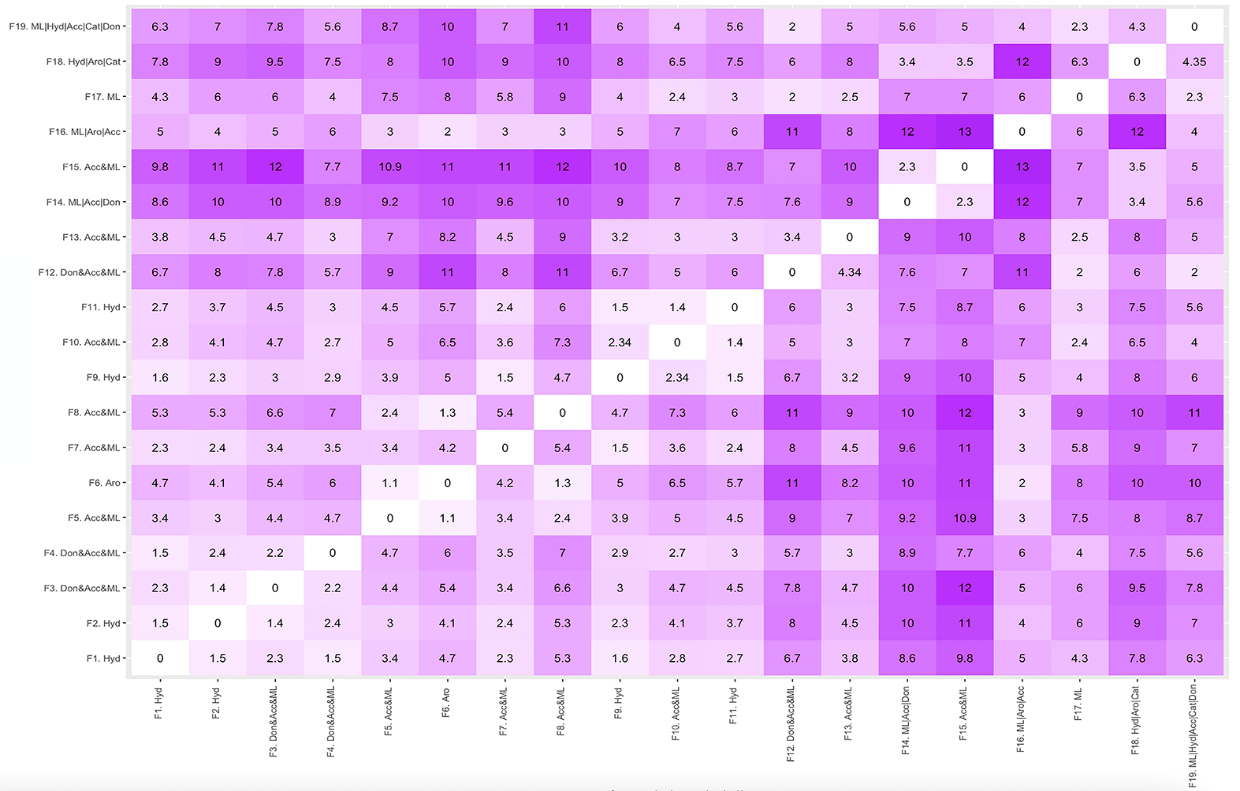


Figure S :The distance between the features in the pharmacophore model generated.
